# Supplementary material for: Multimodal Assessment of Corneal Erosions Using Optical Coherence Tomography and Automated Grading of Fluorescein Staining in a Rabbit Dry Eye Model
Source: PubMed Central journal article supplement — Transl Vis Sci Technol. 2019 Feb 28;8(1):27. doi: 10.1167/tvst.8.1.27 (PMC6396684; doi:10.1167/tvst.8.1.27), 2019-02-28
Supplement: tvst-08-01-18_s01.pdf [file tvst-08-01-18_s01.pdf]

## Supplementary Figure 1

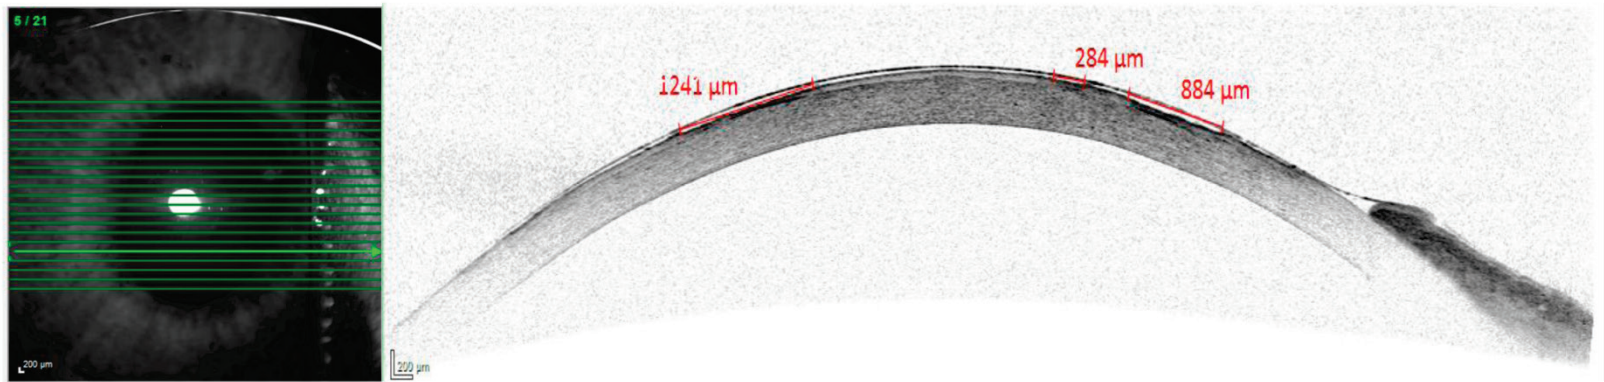

**Supplementary Figure 1. Demonstration of the measurement of SD-OCT corneal erosions.** The length of epithelial erosions (LED) in each B-scan was measured using the Spectralis OCT software (red marks).
